# Supplementary material for: Passive Sampling as a Tool to Assess Atmospheric Pesticide Contamination Related to Vineyard Land Use
Source: MDPI journal article supplement (doi:10.3390/atmos13040504), 2022-03-22
Supplement: s1 [file s1]

---

# Supplementary Materials: Passive Sampling as a Tool to Assess Atmospheric Pesticide Contamination Related to Vineyard Land Use

Stéphan Martin, Marie-Hélène Dévier, Justine Cruz, Geoffroy Duporté, Emmanuelle Barron, Juliette Gaillard, Karyn Le Menach, Patrick Pardon, Sylvie Augagneur, Pierre-Marie Flaud, Éric Villenave and Hélène Budzinski\*

University of Bordeaux, CNRS, EPOC UMR 5805, LPTC, 351 cours de la Libération, 33405 Talence, France; stephan.martin@u-bordeaux.fr (S.M.); marie-helene.devier@u-bordeaux.fr (M.-H.D.); justine.cruz@outlook.fr (J.C.); geoffroy.duporte@umontpellier.fr (G.D.); emmanuelle.barron@u-bordeaux.fr (E.B.); j.gaillard@smiddest.fr (J.G.); karyn.le-menach@u-bordeaux.fr (K.L.M.); patrick.pardon@u-bordeaux.fr (P.P.); sylvie.augagneur@u-bordeaux.fr (S.A.); pierre-marie.flaud@u-bordeaux.fr (P.-M.F.); eric.villenave@u-bordeaux.fr (É.V.)

\* Correspondence: helene.budzinski@u-bordeaux.fr

## SUPPORTING INFORMATION

Table S1. Sampling campaign details

Table S2. Meteorological data during the calibration week

Table S3. LC-MS/MS method conditions and parameters

Table S4. GC-MS/MS method conditions and parameters

Table S5. Method extraction performance for spiked PUF-PAS ( $n=5$ )

Table S6. Concentrations of CUP (ng PUF-PAS<sup>-1</sup>) in the 2 sampling sites for the 2 sampling frequencies

**Table S1: Sampling campaign details**

| Treated and non treated zones |                         |                                  |                         |                          |                                  |
|-------------------------------|-------------------------|----------------------------------|-------------------------|--------------------------|----------------------------------|
| 1 month PUF-PAS               |                         |                                  | 2 months PUF-PAS        |                          |                                  |
| Passive sampling period       | Passive sampling date   | Passive sampling duration (days) | Passive sampling period | Passive Sampling date    | Passive sampling duration (days) |
| 1                             | 20 February-21 March    | 29                               | 1                       | 20 February-23 April     | 62                               |
| 2                             | 21 March-23 April       | 33                               | 2                       | 21 March-29 May          | 68                               |
| 3                             | 23 April-29 May         | 35                               | 3                       | 23 April-26 June         | 63                               |
| 4                             | 29 May-26 June          | 28                               | 4                       | 29 May-24 July           | 56                               |
| 5                             | 26 June-24 July         | 28                               | 5                       | 26 June-11 September     | 77                               |
| 6                             | 24 July-11 September    | 49                               | 6                       | 24 July-17 October       | 85                               |
| 7                             | 11 September-17 October | 36                               | 7                       | 11 September-13 December | 93                               |

**Table S2a. Meteorological data during the calibration week**

|                                       | Day 1<br>4 June | Day 2<br>5 June | Day 3<br>6 June | Day 4<br>7 June | Day 5<br>8 June |
|---------------------------------------|-----------------|-----------------|-----------------|-----------------|-----------------|
| Average temperature (°C)              | 18.1            | 19.3            | 21.1            | 20.9            | 15.2            |
| Maximum temperature (°C)              | 22.5            | 25.8            | 28.4            | 27.6            | 18.8            |
| Rainfall (mm)                         | 0               | 0               | 0               | 0.5             | 71              |
| Mean wind speed (km h <sup>-1</sup> ) | 2.2             | 1.4             | 2.1             | 2.8             | 1.8             |

**Table S2b. Air mass trajectories computed using NOAA HYSPLIT model**

June 4 at noon; 72h (every 9h)

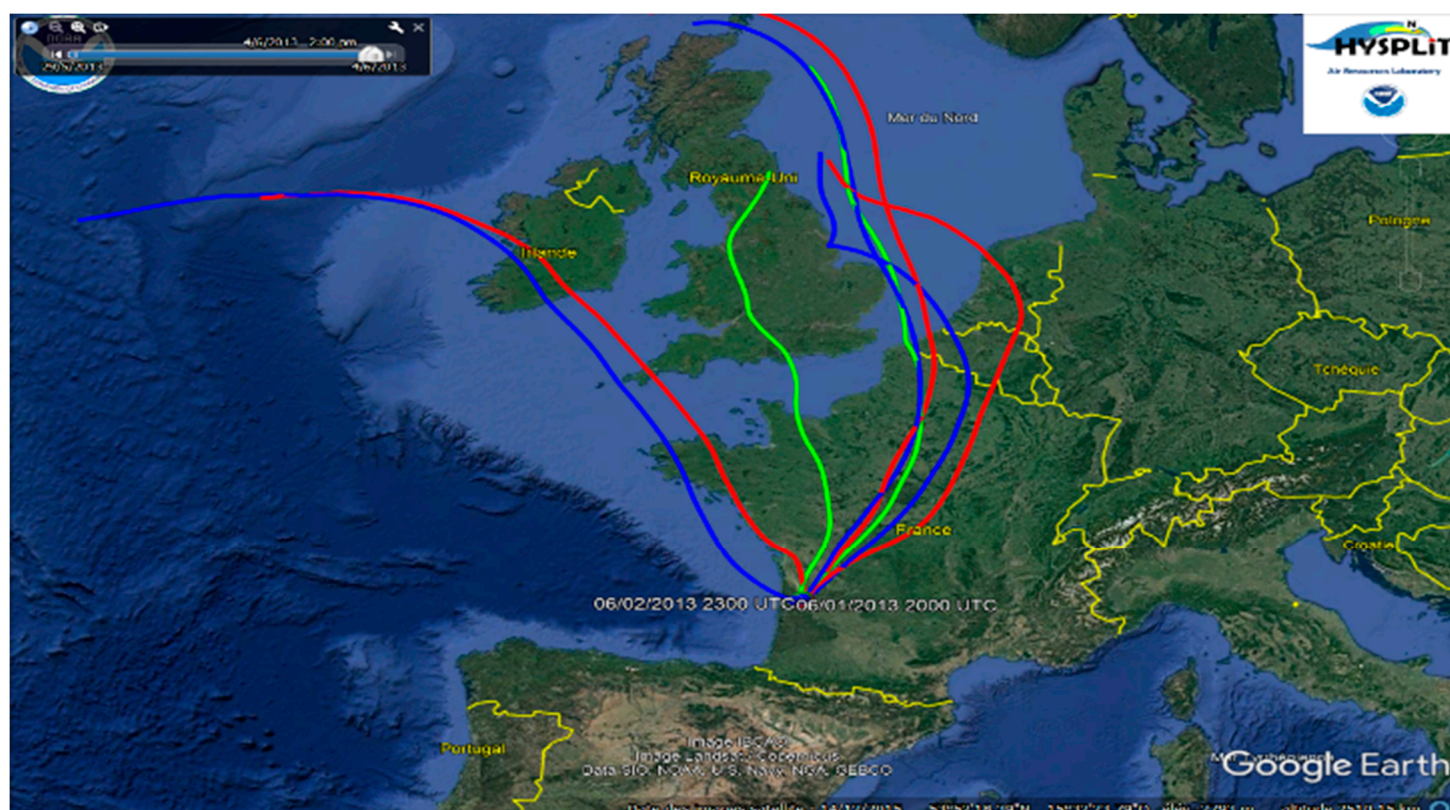



June 5 at noon; 72h (every 9h)

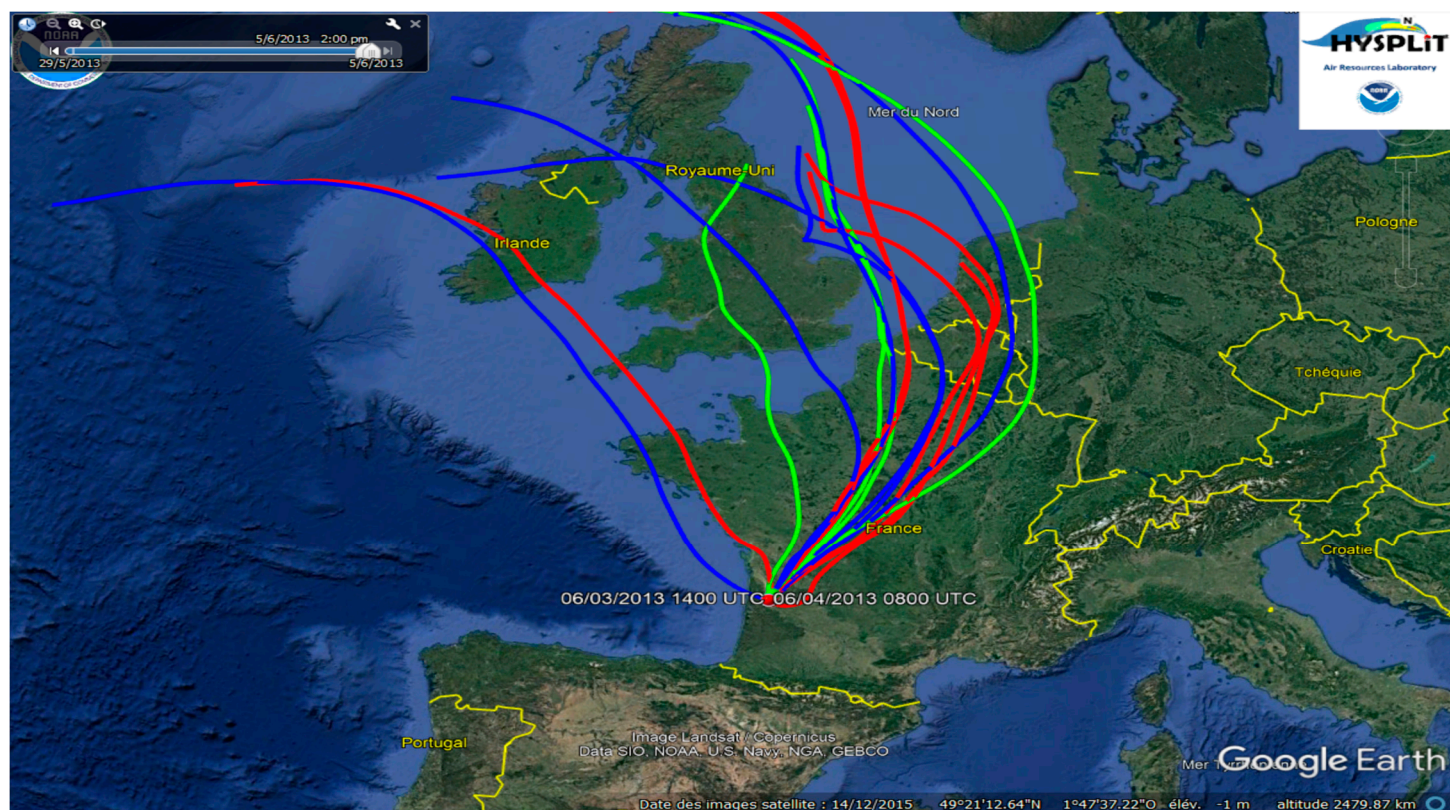

June 6 at noon; 72h (every 9h)

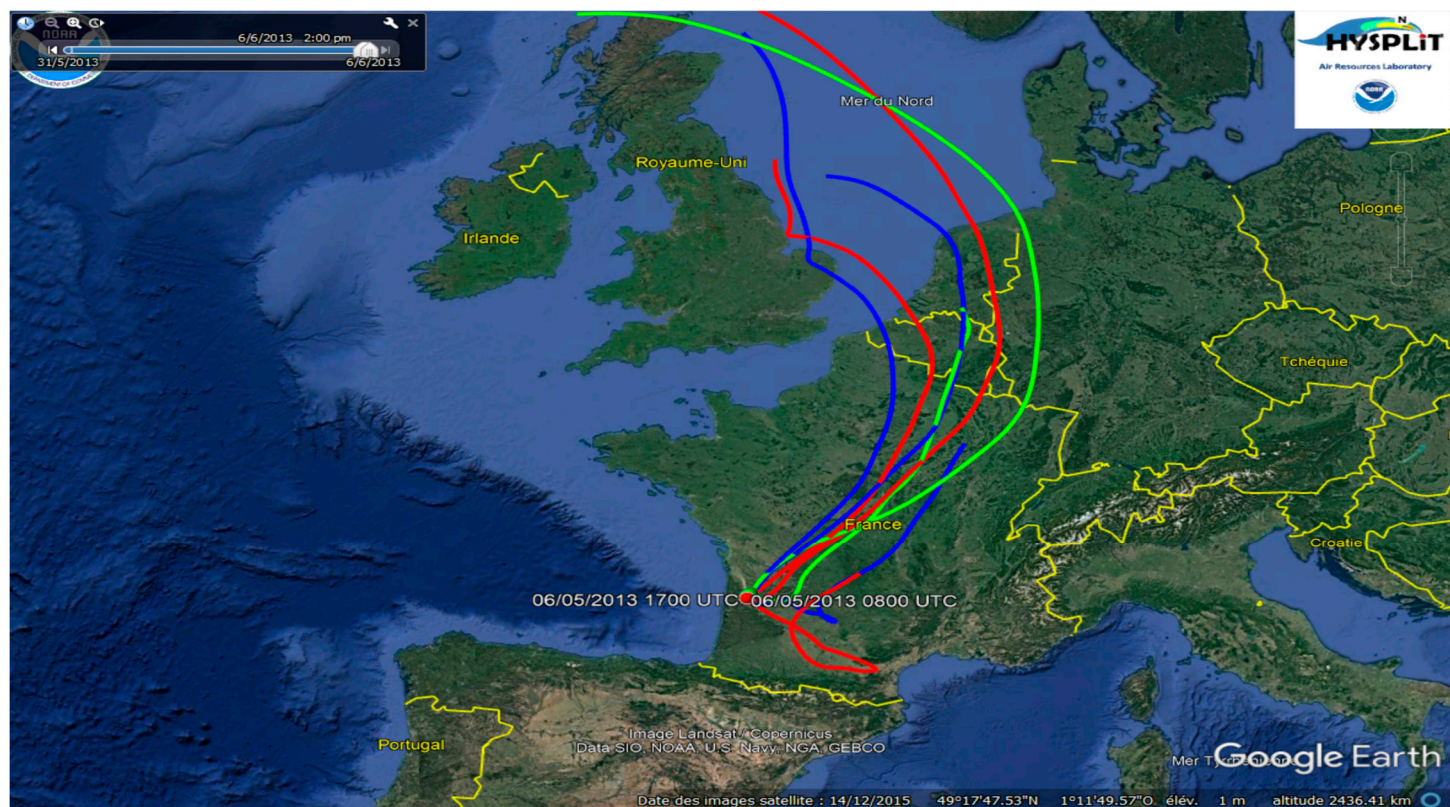



June 7 at noon; 72h (every 9h)

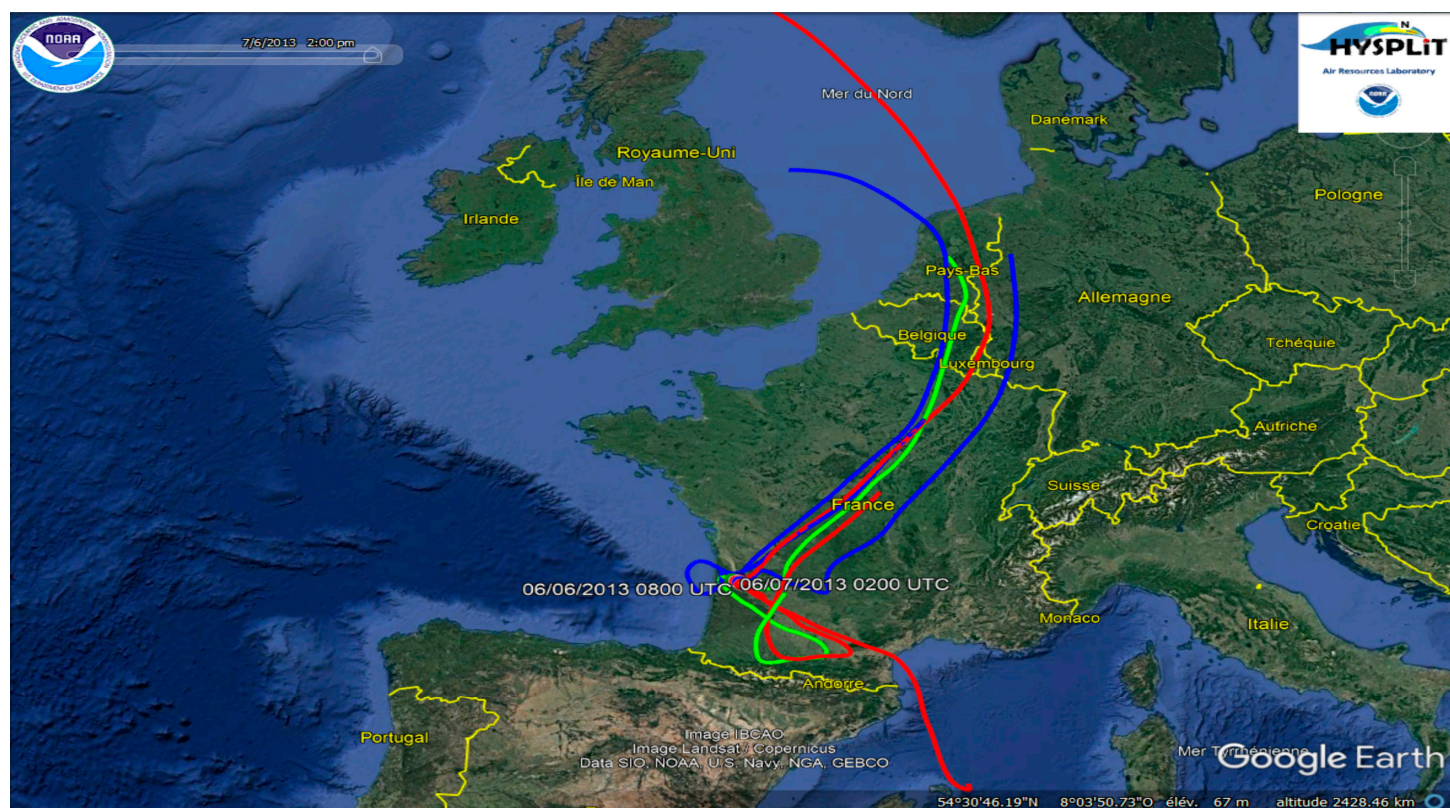

June 8 at noon; 72h (every 9h)

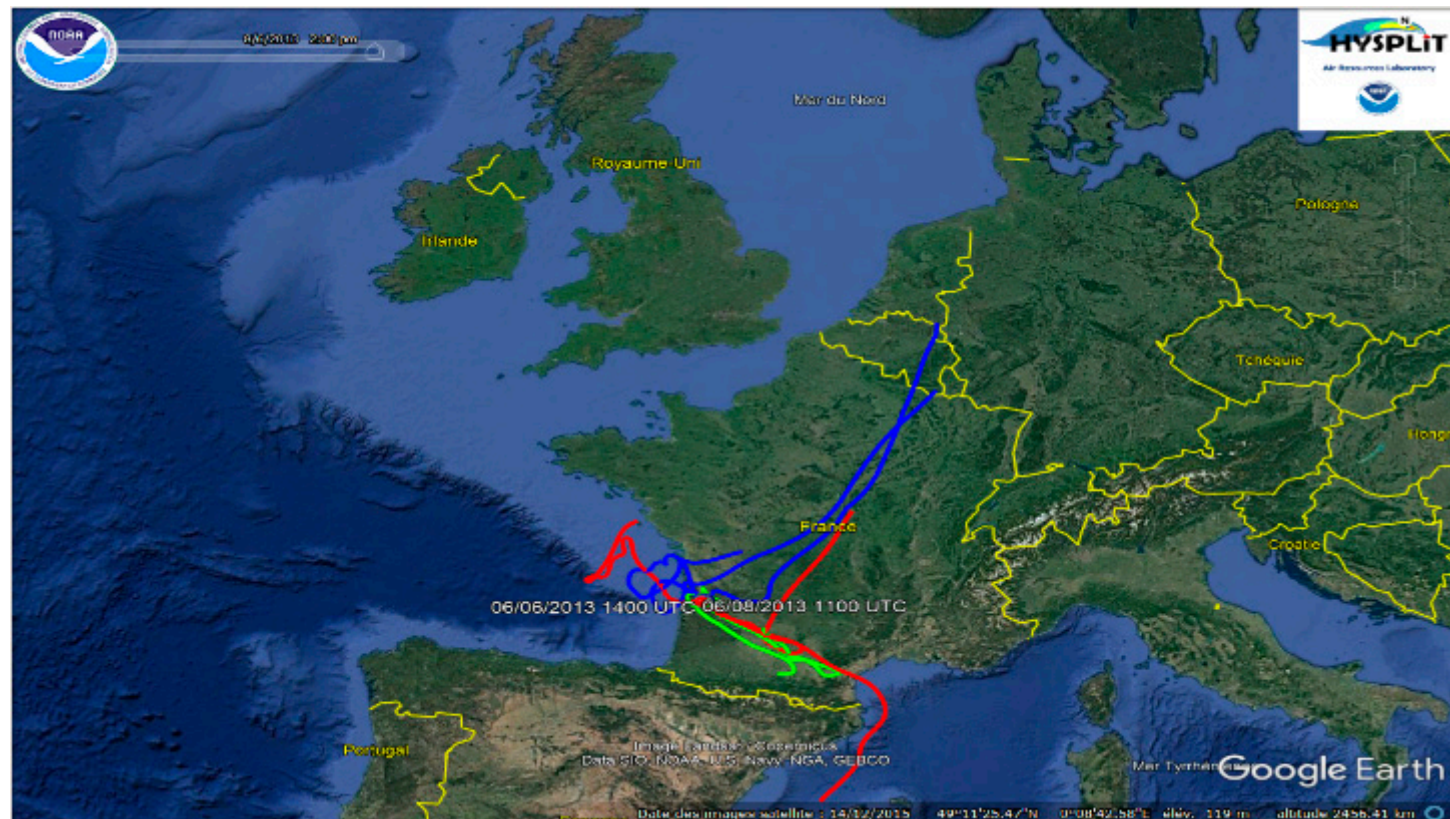

**Table S3. LC-MS/MS method conditions and parameters**

|                                        |                                                                     |
|----------------------------------------|---------------------------------------------------------------------|
| Analytical column:                     | 100 mm x 2.1 mm ; 1.7 $\mu$ m ; Phenomenex, Torrance, CA, USA       |
| Column temperature:                    | 35°C                                                                |
| Volume injected:                       | 5 $\mu$ L                                                           |
| Mobile phase:                          | (A) Water + 0.1% acetic acid, 5 mM ammonium acetate ; (B) Methanol  |
| Flow rate:                             | 0.5 mL min <sup>-1</sup>                                            |
| Linear gradient:                       | 100% A (0 min), 0% A (14 min), 100% A (17 min, 2 min equilibration) |
| Ionization characteristics and source: | ESI + Agilent Jet Stream                                            |
| Gas temperature:                       | 300°C                                                               |
| Gas flow:                              | 8 L min <sup>-1</sup>                                               |
| Nebulizer:                             | 400°C, 11 L min <sup>-1</sup>                                       |
| Capillary voltage:                     | 3000 V                                                              |
| Scan type:                             | Dynamic MRM                                                         |

| Name               | Surrogate standard | Retention time (min) | Quantifier transition |             | Qualifier transition |             | Ratio (%) | Linearity |                   |                | ILOQ (pg injected) |
|--------------------|--------------------|----------------------|-----------------------|-------------|----------------------|-------------|-----------|-----------|-------------------|----------------|--------------------|
|                    |                    |                      | Precursor ion         | Product ion | Precursor ion        | Product ion |           | Slope     | Slope uncertainty | r <sup>2</sup> |                    |
| Ametoctradin       | Thiamethoxam d3    | 11.3                 | 276.22                | 176.1       | 276.22               | 149.1       | 96        | 327       | 7                 | 0.9923         | 0.08               |
| Atrazine           | Atrazine d5        | 8.1                  | 216.1                 | 174         | 216.1                | 68          | 49.6      | 632       | 5                 | 0.9989         | 0.20               |
| <i>Atrazine d5</i> |                    | 8.1                  | 221.1                 | 179         |                      |             |           | 560       | 6                 | 0.9983         | 0.15               |
| Azoxystrobin       | Metolachlor d6     | 9.4                  | 404.1                 | 372.1       | 404.1                | 344.1       | 27.5      | 3518      | 76                | 0.9921         | 0.05               |
| Boscalid           | Terbutylazine d5   | 9.5                  | 343                   | 306.9       | 343                  | 139.9       | 29.6      | 198       | 2                 | 0.9974         | 0.36               |
| Carbendazim        | Thiamethoxam d3    | 5                    | 192.1                 | 160         | 192.1                | 105         | 17.5      | 1579      | 39                | 0.9900         | 0.11               |
| Carbetamide        | Atrazine d5        | 6.6                  | 237.1                 | 192.1       | 237.1                | 118.1       | 79.6      | 1066      | 13                | 0.9973         | 0.05               |
| Cyazofamid         | Atrazine d5        | 10.2                 | 325.1                 | 108         | 325.1                | 44.1        | 23        | 561       | 14                | 0.9890         | 0.11               |



|                           |                   |      |        |       |        |       |       |      |     |        |      |
|---------------------------|-------------------|------|--------|-------|--------|-------|-------|------|-----|--------|------|
| Cymoxanil                 | Atrazine d5       | 5.2  | 221.1  | 175.9 | 221.1  | 149.9 | 58.9  | 11   | 0   | 0.9889 | 10   |
| Cyprodinil                | Atrazine d5       | 10.6 | 226.1  | 93    | 226.1  | 77    | 83.7  | 459  | 6   | 0.9976 | 0.16 |
| Diuron                    | Diuron d6         | 8.4  | 233    | 72    | 233    | 46.1  | 36.6  | 422  | 11  | 0.9888 | 0.07 |
| <i>Diuron d6</i>          |                   | 8.3  | 239.1  | 78    |        |       |       | 449  | 10  | 0.991  | 0.17 |
| Flazasulfuron             | Diuron d6         | 8.4  | 408.1  | 182   | 408.1  | 83    | 31.1  | 259  | 2   | 0.999  | 0.07 |
| Flusilazole               | Hexazinone d6     | 10.4 | 316.1  | 165   | 316.1  | 247   | 104   | 368  | 2   | 0.9994 | 0.35 |
| <i>Hexazinone d6</i>      |                   | 7.1  | 259.2  | 177.1 |        |       |       | 2526 | 62  | 0.9897 | 0.07 |
| Imidacloprid              | Imidacloprid d4   | 4.6  | 256    | 209   | 256    | 175   | 100.8 | 148  | 2   | 0.9956 | 0.70 |
| <i>Imidacloprid d4</i>    |                   | 4.5  | 260.09 | 213.1 |        |       |       | 131  | 2   | 0.9951 | 0.07 |
| Iprovalicarb              | Metolachlor d6    | 10   | 321.2  | 119   | 321.2  | 203   | 29.8  | 2950 | 45  | 0.996  | 0.09 |
| Kresoxim-methyl           | Atrazine d5       | 10.5 | 314.1  | 267   | 314.1  | 222   | 70.7  | 507  | 7   | 0.9964 | 0.19 |
| Mandipropamid             | Terbuthylazine d5 | 9.7  | 412.13 | 328.1 | 412.13 | 356.1 | 36.9  | 913  | 17  | 0.9943 | 0.09 |
| Metalaxyl-M               | Hexazinone d6     | 8.5  | 280.16 | 220.1 | 280.16 | 192.1 |       | 1275 | 36  | 0.9864 | 0.10 |
| Metolachlor (S)           | Metolachlor d6    | 10.1 | 284.1  | 252   | 284.1  | 176.1 | 43.3  | 2072 | 32  | 0.996  | 0.12 |
| <i>Metolachlor (S) d6</i> |                   | 10.1 | 290.2  | 258.1 |        |       |       | 2313 | 44  | 0.9939 | 0.11 |
| Metrafenone               | Terbuthylazine d5 | 11.1 | 409.07 | 209   | 409.07 | 226.9 | 42.3  | 982  | 16  | 0.9956 | 0.11 |
| Myclobutanil              | Metolachlor d6    | 9.7  | 289.1  | 70    | 289.1  | 125   | 29.2  | 530  | 5   | 0.9982 | 0.09 |
| Propiconazole             | Metolachlor d6    | 10.8 | 342.1  | 158.9 | 342.1  | 69    | 74.9  | 287  | 1   | 0.9997 | 0.38 |
| Simazine                  | Simazine d10      | 7    | 202.1  | 68    | 202.1  | 103.9 | 75.5  | 172  | 2   | 0.9976 | 0.55 |
| <i>Simazine d10</i>       |                   | 6.9  | 212.1  | 104.9 |        |       |       | 227  | 2   | 0.9981 | 2.29 |
| Spiroxamine               | Simazine d10      | 9.5  | 298.3  | 144   | 298.3  | 100   | 54.3  | 5737 | 317 | 0.9506 | 0.04 |
| Tebufenpyrad              | Simazine d10      | 11.8 | 334.17 | 145   | 334.17 | 117   | 104.3 | 361  | 3   | 0.9984 | 0.15 |
| Terbuthylazine            | Terbuthylazine d5 | 9.5  | 230.1  | 68    |        |       |       | 225  | 4   | 0.994  | 0.42 |
| <i>Terbuthylazine d5</i>  |                   | 9.3  | 235    | 179   |        |       |       | 1021 | 20  | 0.9934 | 0.11 |
| Thiamethoxam              | Thiamethoxam d3   | 3.7  | 292    | 211   | 292    | 181   | 41.6  | 303  | 8   | 0.9878 | 0.20 |

|                 |             |      |        |       |       |       |      |      |    |        |      |
|-----------------|-------------|------|--------|-------|-------|-------|------|------|----|--------|------|
| Thiamethoxam d3 |             | 3.6  | 295.05 | 214.1 |       |       |      | 286  | 8  | 0.988  | 0.27 |
| Trifloxystrobin | Atrazine d5 | 11.4 | 409.1  | 186   | 409.1 | 145   | 58.2 | 2155 | 34 | 0.9958 | 0.14 |
| Zoxamide        | Atrazine d5 | 10.7 | 336    | 186.9 | 336   | 158.9 | 54   | 531  | 9  | 0.995  | 0.49 |

**Table S4. GC-MS/MS method conditions and parameters**

|                            |                                                                                                                               |
|----------------------------|-------------------------------------------------------------------------------------------------------------------------------|
| Analytical column:         | HP 5 MS UI (30 m x 0.25 mm x 0.25 µm film thickness; 5% phenylmethylsiloxane, Agilent J&M GC column)                          |
| Column temperature:        | 60°C (hold 2 min), 209°C (25°C min <sup>-1</sup> ), 230°C (5°C min <sup>-1</sup> ), 325°C (25°C min <sup>-1</sup> hold 2 min) |
| Flow rate:                 | 11 mL min <sup>-1</sup>                                                                                                       |
| Carrier gas:               | Helium (6.0)                                                                                                                  |
| Ionisation source:         | EI (70 eV)                                                                                                                    |
| Transfer line temperature: | 290°C                                                                                                                         |
| Ion source temperature:    | 230°C                                                                                                                         |
| Quadrupole temperature:    | 150°C                                                                                                                         |

| Name                   | Surrogate standard     | Retention time (minutes) | Quantifier transition |             | Qualifier transition |             | Ratio (%) | Linearity |                   |                | ILOQ (pg injected) |
|------------------------|------------------------|--------------------------|-----------------------|-------------|----------------------|-------------|-----------|-----------|-------------------|----------------|--------------------|
|                        |                        |                          | Precursor ion         | Product ion | Precursor ion        | Product ion |           | Slope     | Slope uncertainty | r <sup>2</sup> |                    |
| Bifenthrin             | Chlorpyrifos-ethyl d10 | 14.1                     | 181.0                 | 166.0       | 181.0                | 165.0       | 38        | 1213      | 58                | 0.9561         | 0.28               |
| Chlorpyrifos-ethyl d10 |                        | 10.3                     | 324.0                 | 260.0       |                      |             |           | 323       | 6                 | 0.993          | 0.06               |
| Chlorpyrifos-methyl    | Chlorpyrifos-ethyl d10 | 9.8                      | 286.0                 | 93.0        | 286                  | 271         | 62        | 286       | 5                 | 0.9937         | 0.09               |
| Fipronil               | Parathion-methyl d6    | 10.8                     | 367.0                 | 213.0       | 367.0                | 255.0       | 35        | 83        | 4                 | 0.9466         | 0.32               |
| Fipronil sulfide       | Parathion-methyl d6    | 10.7                     | 351.0                 | 255.0       | 351.0                | 228.0       | 33        | 307       | 14                | 0.9592         | 0.23               |
| Fipronil sulfone       | Parathion-methyl d6    | 11.7                     | 383.0                 | 255.0       | 213.0                | 178.0       | 32        | 105       | 7                 | 0.9194         | 0.57               |
| Folpet                 | Folpet d4              | 11.0                     | 259.7                 | 129.9       | 261.7                | 130.0       | 79        | 143       | 6                 | 0.9650         | 0.64               |



|                            |                        |      |       |       |       |       |     |     |    |        |      |
|----------------------------|------------------------|------|-------|-------|-------|-------|-----|-----|----|--------|------|
| <i>Folpet d4</i>           |                        | 11.0 | 263.7 | 134.0 | 265.7 | 134.0 | 67  | 125 | 6  | 0.9608 | 0.83 |
| Fludioxonil                | Chlorpyrifos-ethyl d10 | 11.6 | 247.8 | 153.9 | 247.8 | 126.9 | 97  | 159 | 11 | 0.9113 | 1.52 |
| <i>Parathion-methyl d6</i> |                        | 9.8  | 269.0 | 115.0 | 269   | 131   | 6   | 187 | 10 | 0.9491 | 0.13 |
| Quinoxifen                 | Chlorpyrifos-ethyl d10 | 13.1 | 272.0 | 237.0 | 237   | 208   | 167 | 504 | 21 | 0.9676 | 0.17 |
| Tetraconazole              | Chlorpyrifos-ethyl d10 | 10.4 | 336.0 | 204.0 | 171.0 | 136.0 | 75  | 142 | 5  | 0.9770 | 0.51 |

**Table S5. Method extraction performance for spiked PUF-PAS ( $n=5$ )**

| Name                | Analysis | Extraction accuracy |     | LOQ (ng PUF-PAS <sup>-1</sup> ) | Extrapolated LOQ (pg m <sup>-3</sup> ) |     |
|---------------------|----------|---------------------|-----|---------------------------------|----------------------------------------|-----|
|                     |          | Mean                | SD  | Mean                            | Mean                                   | CV  |
| Ametoctradin        | LC-MS/MS | 117%                | 47% | 0.7                             | 4.7                                    | 50% |
| Atrazine            | LC-MS/MS | 135%                | 21% | 0.6                             | 4.3                                    | 26% |
| Azoxystrobin        | LC-MS/MS | 75%                 | 17% | 0.2                             | 1.5                                    | 43% |
| Bifenthrin          | GC-MS/MS | 126%                | 19% | 27.8                            | 185.5                                  | 35% |
| Boscalid            | LC-MS/MS | 83%                 | 11% | 2.2                             | 14.7                                   | 33% |
| Carbendazim         | LC-MS/MS | 55%                 | 21% | 0.4                             | 2.7                                    | 38% |
| Carbetamide         | LC-MS/MS | 160%                | 23% | 0.1                             | 0.4                                    | 24% |
| Chlorpyrifos-methyl | GC-MS/MS | 98%                 | 12% | 1.6                             | 10.3                                   | 32% |
| Cyazofamid          | LC-MS/MS | 135%                | 60% | 0.3                             | 2.2                                    | 45% |
| Cymoxanil           | LC-MS/MS | 104%                | 74% | 34.7                            | 231.1                                  | 61% |
| Cyprodinil          | LC-MS/MS | 135%                | 77% | 2.7                             | 18.0                                   | 57% |
| Diuron              | LC-MS/MS | 116%                | 16% | 0.4                             | 2.7                                    | 34% |
| Fipronil            | GC-MS/MS | 110%                | 14% | 1.4                             | 9.1                                    | 22% |
| Fipronil sulfide    | GC-MS/MS | 99%                 | 29% | 1.6                             | 10.9                                   | 29% |
| Fipronil sulfone    | GC-MS/MS | 102%                | 21% | 2.1                             | 13.9                                   | 21% |
| Flazasulfuron       | LC-MS/MS | 36%                 | 11% | 0.6                             | 4.2                                    | 32% |
| Fludioxonil         | GC-MS/MS | 105%                | 22% | 5.6                             | 37.3                                   | 41% |
| Flusilazole         | LC-MS/MS | 82%                 | 31% | 1.1                             | 7.5                                    | 38% |
| Folpet              | GC-MS/MS | 97%                 | 18% | 8.6                             | 57.1                                   | 39% |
| Imidacloprid        | LC-MS/MS | 101%                | 41% | 0.7                             | 4.5                                    | 41% |
| Iprovalicarb        | LC-MS/MS | 81%                 | 14% | 0.2                             | 1.3                                    | 27% |
| Kresoxim-methyl     | LC-MS/MS | 120%                | 68% | 0.6                             | 3.7                                    | 57% |
| Mandipropamid       | LC-MS/MS | 86%                 | 13% | 0.4                             | 2.7                                    | 35% |
| Metalaxyl-M         | LC-MS/MS | 107%                | 45% | 0.1                             | 1.0                                    | 42% |
| Metolachlor (S)     | LC-MS/MS | 90%                 | 10% | 11.1                            | 74.0                                   | 51% |
| Metrafenone         | LC-MS/MS | 78%                 | 37% | 0.8                             | 5.3                                    | 48% |
| Myclobutanil        | LC-MS/MS | 81%                 | 18% | 0.2                             | 1.5                                    | 22% |
| Propiconazole       | LC-MS/MS | 149%                | 64% | 12.4                            | 82.5                                   | 43% |
| Quinoxifen          | GC-MS/MS | 107%                | 14% | 2.1                             | 14.2                                   | 23% |
| Simazine            | LC-MS/MS | 75%                 | 22% | 3.3                             | 22.1                                   | 49% |
| Spiroxamine         | LC-MS/MS | 119%                | 39% | 0.1                             | 0.5                                    | 33% |
| Tebufenpyrad        | LC-MS/MS | 114%                | 54% | 1.5                             | 9.8                                    | 47% |
| Terbutylazine       | LC-MS/MS | 98%                 | 13% | 0.7                             | 4.6                                    | 56% |
| Thiamethoxam        | LC-MS/MS | 94%                 | 15% | 1.1                             | 7.4                                    | 46% |
| Trifloxystrobin     | LC-MS/MS | 109%                | 52% | 0.1                             | 0.7                                    | 48% |
| Zoxamide            | LC-MS/MS | 135%                | 52% | 1.0                             | 6.5                                    | 39% |



**Table S6. Concentrations of CUP (ng PUF-PAS<sup>-1</sup>) in the 2 sampling sites for the 2 sampling frequencies**

|                          |                            | Amounts accumulated on PUF-PAS (ng PUF-PAS <sup>-1</sup> ) in the treated zone (TZ) |                 |                 |                 |                 |                 |                 |                  |                 |                 |                 |                 |                 |                 |
|--------------------------|----------------------------|-------------------------------------------------------------------------------------|-----------------|-----------------|-----------------|-----------------|-----------------|-----------------|------------------|-----------------|-----------------|-----------------|-----------------|-----------------|-----------------|
|                          |                            | 1 month PUF-PAS                                                                     |                 |                 |                 |                 |                 |                 | 2 months PUF-PAS |                 |                 |                 |                 |                 |                 |
|                          |                            | 20/02-<br>21/03                                                                     | 21/03-<br>23/04 | 23/04-<br>29/05 | 29/05-<br>26/06 | 26/06-<br>24/07 | 24/07-<br>11/09 | 11/09-<br>17/10 | 20/02-<br>23/04  | 21/03-<br>29/05 | 23/04-<br>26/06 | 29/05-<br>24/07 | 26/06-<br>11/09 | 24/07-<br>17/10 | 11/09-<br>13/12 |
| Sampling duration (days) |                            | 29                                                                                  | 33              | 35              | 28              | 28              | 49              | 36              | 62               | 68              | 63              | 56              | 77              | 85              | 93              |
| Ametoctradin             | Appli. 17/05               | <LQ                                                                                 | <LQ             | <b>1208</b>     | 58              | 18              | 6               | <LQ             | <LQ              | <b>720</b>      | <b>536</b>      | 54              | 22              | 3               | <LQ             |
| Azoxystrobin             |                            | <LQ                                                                                 | <LQ             | 1               | <LQ             | 21              | <LQ             | 1               | <LQ              | <LQ             | <LQ             | 16              | <LQ             | <LQ             | <LQ             |
| Boscalid                 | Appli. 08/07               | <LQ                                                                                 | 8               | 11              | 79              | <b>17,615</b>   | 766             | 206             | 9                | <LQ             | 135             | <b>27,089</b>   | <b>16,435</b>   | 813             | 529             |
| Carbendazim              |                            | <LQ                                                                                 | <LQ             | 6               | 2               | <LQ             | <LQ             | <LQ             | <LQ              | 3               | 14              | 10              | 4               | <LQ             | <LQ             |
| Chlorpyrifos-methyl      | Appli. 01/07, 01/08        | <LQ                                                                                 | <LQ             | 50              | 137             | <b>3931</b>     | <b>2803</b>     | 12              | 3                | 7               | 167             | <b>3638</b>     | <b>6574</b>     | <b>1567</b>     | 9               |
| Cyazofamid               | Appli. 02/08               | <LQ                                                                                 | <LQ             | 5               | 18              | 5               | <b>70</b>       | 11              | <LQ              | 3               | 14              | 10              | <b>218</b>      | <b>64</b>       | 6               |
| Cyprodinil               |                            | <LQ                                                                                 | 16              | <LQ             | <LQ             | 48              | <LQ             | <LQ             | <LQ              | <LQ             | 26              | 34              | 23              | <LQ             | <LQ             |
| Fipronil                 |                            | <LQ                                                                                 | 3               | <LQ             | <LQ             | 3               | 2               | <LQ             | 4                | <LQ             | <LQ             | <LQ             | <LQ             | <LQ             | <LQ             |
| Fipronil sulfide         |                            | <LQ                                                                                 | 6               | <LQ             | <LQ             | 2               | 2               | <LQ             | 6                | <LQ             | <LQ             | <LQ             | <LQ             | <LQ             | <LQ             |
| Fipronil sulfone         |                            | <LQ                                                                                 | 6               | <LQ             | <LQ             | <LQ             | 3               | <LQ             | 8                | <LQ             | <LQ             | <LQ             | <LQ             | <LQ             | <LQ             |
| Fludioxonil              |                            | <LQ                                                                                 | <LQ             | 13              | 31              | 124             | 11              | <LQ             | <LQ              | <LQ             | 35              | 163             | <LQ             | 13              | <LQ             |
| Folpet                   | Appli. 07/05, 17/06, 17/07 | 61                                                                                  | 143             | <b>1960</b>     | <b>23,481</b>   | <b>9504</b>     | 3292            | 462             | 78               | <b>9434</b>     | <b>27,140</b>   | <b>15,137</b>   | <b>4682</b>     | 1220            | 152             |
| Iprovalicarb             | Appli. 17/06               | <LQ                                                                                 | <LQ             | 2               | <b>414</b>      | 71              | 8               | 2               | <LQ              | 2               | <b>492</b>      | <b>403</b>      | 65              | 6               | 2               |
| Kresoxim-methyl          | Appli. 16/07               | <LQ                                                                                 | <LQ             | 6               | 21              | <b>1189</b>     | 164             | 8               | <LQ              | <LQ             | 21              | <b>922</b>      | <b>996</b>      | 132             | 4               |
| Mandipropamid            | Appli. 27/05               | <LQ                                                                                 | <LQ             | <b>852</b>      | 176             | 34              | 15              | <LQ             | <LQ              | <b>582</b>      | <b>727</b>      | 131             | 19              | 4               | 4               |
| Metalaxyl-M              | Appli. 07/05               | <LQ                                                                                 | <LQ             | <b>3324</b>     | 41              | 19              | 4               | <LQ             | <LQ              | <b>1992</b>     | <b>3351</b>     | 33              | 17              | 5               | <LQ             |
| Metolachlor (S)          |                            | <LQ                                                                                 | <LQ             | 1481            | 150             | <LQ             | <LQ             | <LQ             | <LQ              | 1246            | 1626            | 165             | <LQ             | <LQ             | <LQ             |

|                 |              |     |     |            |             |            |     |     |     |            |             |             |            |     |     |
|-----------------|--------------|-----|-----|------------|-------------|------------|-----|-----|-----|------------|-------------|-------------|------------|-----|-----|
| Metrafenone     | Appli. 27/05 | <LQ | <LQ | <b>254</b> | 42          | 7          | <LQ | <LQ | <LQ | <b>148</b> | <b>212</b>  | 35          | 7          | <LQ | <LQ |
| Myclobutanil    | Appli. 05/06 | <LQ | <LQ | 7          | <b>1774</b> | 747        | 14  | 4   | <LQ | 7          | <b>2052</b> | <b>3378</b> | 749        | 15  | 5   |
| Quinoxifen      | Appli. 17/05 | <LQ | <LQ | <b>13</b>  | 51          | 58         | 7   | <LQ | <LQ | <b>368</b> | <b>381</b>  | 68          | 11         | 7   | <LQ |
| Spiroxamine     | Appli. 17/06 | <LQ | <LQ | 73         | <b>2193</b> | 57         | 5   | <LQ | <LQ | 41         | <b>1831</b> | <b>858</b>  | 35         | 4   | <LQ |
| Trifloxystrobin |              | <LQ | <LQ | 3          | 10          | 3          | <LQ | <LQ | <LQ | 1          | 8           | 7           | 2          | <LQ | <LQ |
| Zoxamide        | Appli. 01/07 | <LQ | <LQ | 37         | 6           | <b>428</b> | 22  | 7   | <LQ | 24         | 36          | <b>501</b>  | <b>314</b> | 18  | 7   |

in bold: sampling period during which the pesticide was applied (when applied)

|                          |                     | Amounts accumulated on PUF-PAS (ng PUF-PAS <sup>-1</sup> ) in the non-treated zone (NTZ) |                 |                 |                 |                 |                 |                 |                  |                 |                 |                 |                 |                 |                 |
|--------------------------|---------------------|------------------------------------------------------------------------------------------|-----------------|-----------------|-----------------|-----------------|-----------------|-----------------|------------------|-----------------|-----------------|-----------------|-----------------|-----------------|-----------------|
|                          |                     | 1 month PUF-PAS                                                                          |                 |                 |                 |                 |                 |                 | 2 months PUF-PAS |                 |                 |                 |                 |                 |                 |
|                          |                     | 20/02-<br>21/03                                                                          | 21/03-<br>23/04 | 23/04-<br>29/05 | 29/05-<br>26/06 | 26/06-<br>24/07 | 24/07-<br>11/09 | 11/09-<br>17/10 | 20/02-<br>23/04  | 21/03-<br>29/05 | 23/04-<br>26/06 | 29/05-<br>24/07 | 26/06-<br>11/09 | 24/07-<br>17/10 | 11/09-<br>13/12 |
| Sampling duration (days) |                     | 29                                                                                       | 33              | 35              | 28              | 28              | 49              | 36              | 62               | 68              | 63              | 56              | 77              | 85              | 93              |
|                          |                     |                                                                                          |                 |                 |                 |                 |                 |                 |                  |                 |                 |                 |                 |                 |                 |
| Ametoctradin             | Appli. 17/05        | <LQ                                                                                      | <LQ             | 43              | 34              | 9               | 2               | <LQ             | <LQ              | 92              | 92              | 50              | 11              | <LQ             | <LQ             |
| Azoxystrobin             |                     | <LQ                                                                                      | <LQ             | <LQ             | <LQ             | 17              | <LQ             | <LQ             | <LQ              | <LQ             | <LQ             | 19              | <LQ             | <LQ             | <LQ             |
| Boscalid                 | Appli. 08/07        | 27                                                                                       | 7               | <LQ             | 56              | 640             | 118             | 40              | 5                | <LQ             | 47              | 1215            | 752             | 88              | 12              |
| Carbendazim              |                     | <LQ                                                                                      | <LQ             | 3               | 6               | <LQ             | 1               | <LQ             | <LQ              | <LQ             | <LQ             | <LQ             | 8               | <LQ             | <LQ             |
| Chlorpyrifos-methyl      | Appli. 01/07, 01/08 | <LQ                                                                                      | <LQ             | <LQ             | na*             | 96              | 426             | 7               | <LQ              | 4               | 57              | 119             | 928             | 283             | 4               |
| Cyazofamid               | Appli. 02/08        | 8                                                                                        | <LQ             | 2               | 11              | <LQ             | 27              | 2               | <LQ              | <LQ             | 7               | 6               | 47              | 25              | <LQ             |
| Cyprodinil               |                     | <LQ                                                                                      | <LQ             | <LQ             | <LQ             | 30              | <LQ             | <LQ             | <LQ              | <LQ             | <LQ             | 24              | <LQ             | <LQ             | <LQ             |
| Fipronil                 |                     | <LQ                                                                                      | <LQ             | <LQ             | na              | <LQ             | <LQ             | <LQ             | <LQ              | <LQ             | <LQ             | <LQ             | <LQ             | <LQ             | <LQ             |
| Fipronil sulfide         |                     | <LQ                                                                                      | <LQ             | <LQ             | na              | <LQ             | <LQ             | <LQ             | <LQ              | <LQ             | <LQ             | <LQ             | <LQ             | <LQ             | <LQ             |

|                  |                            |     |     |      |     |      |     |     |     |      |      |      |      |     |     |
|------------------|----------------------------|-----|-----|------|-----|------|-----|-----|-----|------|------|------|------|-----|-----|
| Fipronil sulfone |                            | <LQ | <LQ | <LQ  | na  | <LQ  | <LQ | <LQ | <LQ | <LQ  | <LQ  | <LQ  | <LQ  | <LQ | <LQ |
| Fludioxonil      |                            | <LQ | <LQ | <LQ  | na  | 68   | 8   | <LQ | <LQ | <LQ  | <LQ  | 60   | 22   | <LQ | <LQ |
| Folpet           | Appli. 07/05, 17/06, 17/07 | <LQ | 24  | 1763 | na  | 2962 | 908 | 154 | 20  | 3608 | 6015 | 7262 | 2649 | 622 | 76  |
| Iprovalicarb     | Appli. 17/06               | 4   | <LQ | <LQ  | 54  | 7    | <LQ | <LQ | <LQ | <LQ  | 45   | 63   | 12   | <LQ | <LQ |
| Kresoxim-methyl  | Appli. 16/07               | 3   | <LQ | 2    | 10  | 52   | 4   | <LQ | <LQ | <LQ  | 8    | 67   | 34   | 4   | <LQ |
| Mandipropamid    | Appli. 27/05               | 9   | <LQ | 3    | 59  | 6    | 2   | <LQ | <LQ | <LQ  | 56   | 56   | 11   | <LQ | <LQ |
| Metalaxyl-M      | Appli. 07/05               | 13  | <LQ | 331  | 20  | 3    | 3   | <LQ | <LQ | 682  | 481  | 23   | <LQ  | 1   | <LQ |
| Metolachlor (S)  |                            | <LQ | <LQ | <LQ  | <LQ | 18   | <LQ | <LQ | <LQ | <LQ  | <LQ  | <LQ  | <LQ  | <LQ | <LQ |
| Metrafenone      | Appli. 27/05               | 6   | <LQ | 4    | 17  | 2    | <LQ | <LQ | <LQ | 5    | 19   | 22   | 3    | <LQ | <LQ |
| Myclobutanil     | Appli. 05/06               | 15  | <LQ | 1    | 371 | 9    | <LQ | <LQ | <LQ | 5    | 389  | 513  | 14   | <LQ | <LQ |
| Quinoxifen       | Appli. 17/05               | <LQ | <LQ | 27   | na  | 41   | 6   | <LQ | <LQ | 40   | 46   | 69   | 29   | 4   | <LQ |
| Spiroxamine      | Appli. 17/06               | 34  | <LQ | 10   | 189 | 6    | 3   | <LQ | <LQ | 13   | 128  | 120  | 4    | 1   | <LQ |
| Trifloxystrobin  |                            | 1   | <LQ | 1    | 6   | 2    | <LQ | <LQ | <LQ | 2    | 7    | 7    | 1    | <LQ | <LQ |
| Zoxamide         | Appli. 01/07               | 11  | <LQ | 5    | 3   | 13   | 3   | <LQ | <LQ | 10   | 11   | 27   | 13   | 3   | <LQ |

\* na: not analyzed
